# Supplementary material for: Clustering of Genetic Anomalies of Cilia Outer Dynein Arm and Central Apparatus in Patients with Transposition of the Great Arteries
Source: MDPI journal article supplement (doi:10.3390/genes13091662), 2022-09-16
Supplement: s1 [file s1]

**Table S1: List of cilia genes and previously reported genes analyzed in the patients with transposition of the great arteries.**

**Motile cilia genes:**

**Central pair:**

*HYDIN, CCDC180, CFAP54, SPAG6, SPAG17, WDR93*

**Nexin-dynein regulator complex:**

*CCD39, CCDC65, CCDC40, DRC1, GAS8, CCDC164, CCDC40, CCDC65, DRC3, DRC7, FBXL13, TCTE1*

**Radial spoke:**

*DYDC2, DNAJB13, RSPH1, RSPH2, RSPH3, RSPH4A, RSPH9, PPIL6, RPON1L RSPH10B, RSPH10B2, RSPH14*

**Centrosomal:**

*CCDC113, C4orf47, CEP295, CCDC113, C4orf47, CEP104, CEP120, CEP162, CEP19, CEP192, CEP44, CEP76, CEP83, CEP83, CEP97*

**Centriole :**

*CFAP53, CFAP65, DEUP1, KIF24, NEK5, OFD1, POC1B*

**Centriolar satellite:**

*CCDC81, CCDC96, CCDC146, NEK10, TEX9*

**Ciliary tip:**

*ARMC9, CEP104*

**Outer dyneir arm:**

*CFAP70*

Heavy chain

*DNAH1, DNAH9, DNAH11, DNAH5, DNAH8*

Intermediate chain

*DNAI1, DNAI2*

Light Chain

*DNAL1, DYNLRB2, NME9*

**Inner dynein arm**

*CASC1, ZMNYD12*

Heavy chain

*DNAH2, DNAH3, DNAH6, DNAH10, DNAH12*

Intermediate chain

*WDR63, WDR78*

**Light intermediate chain**

*DNAL1*

**Cytoplasm region of cilia:**

*PIH1D3*

**Dynein pre-assembly:**

*DNAAF1, DNAAF2, DNAAF3, DNAAF4, DNAAF5, SPAG1, ZMYND10, LRCC6, C21Orf59*

**Axoneme:**

*AKAP14, CCDC173, CCDC33, CFAP43, EFHC1, EFHC2, LRGUK, PPP1R32, PACRG, RIBC2, SPACA9. TTCT29, TEK1, WDR66*

**Periaxoneme**

*SPATA6, TEK3*

**Outer dense fiber**

*TEKT2, TEK4H*

**Other gene related to Outer /inner dynein arm:**

*NME6, NME8, CLASP1*

**Cilia 96-nm repeat ruler:**

*CCDC39, CCDC40*

**Outer dynein arm attachment:**

*CCDC103*

**Docking complex:**

*ARMC4, CCDC114, CCDC151, MNS1, DZANK1*

**Dynein Motor Complex:**

*TTC25*

## Non-motile cilia:

### Axoneme and signaling :

*ADCY6, ANKS3, ANKS6, CEP41, CNG11, CNGA41, CNGB1, C2orf71, C2orf2, DCDC2, EFHC1, FLCN1, GPR161, ICK, INPP5E, IQCB1, LCA5, NEK1, OCRL, PIK3R4, PKD1, PKD2, PKD1L1, RAB23, SDCCAG8, SMO, USP9X*

### Dynein assembly docking :

*ARMC4, CCDC114, DNAAF1, HEATR2, LRCC6, MNS1, ZMNYD10*

### Primary Cilia assembly:

*PIBF1*

### Cilium tip:

*CEP104, GLI2, GLI3, KIF7, SUFU*

### INV compartment:

*EVC2, EVC, INVS, NPHP3, NEK8, IQCE*

### Other: Cytosol, Golgi, nucleus, etc

*AK7, DDX59, GALNT11, GLIS2, PIK3R4, POMGNT1, TBC1D32, XPNPEP3, ZNF423*

### Transcription factor:

*CRX, ZIC2*

### Other non motile-cilia related genes:

*ALS2CR12, CFAP61, CFAP77, CFAP100, CFAP299, C9orf116, FANK1, IQCD, IQUB, LRRC34, EFCAB1, MYCBPAP, SPA17*

### Cilia tip

*C1orf87*

### Golgi cilia network

*PIFO*

### Cytoskeleton

*CATIP, DCDC1, TTC23L*

### Transcription factors:

*FOXJ1, RFX*

## Ciliogenesis:

### Centriole or basal body:

*ALMS1, ARL2BP, CENPF, CEP19, CEP41, EP78, CEP104, CEP120, CSPP1, C2CD3, C21orf2, FAM16A, FLCN, HYL51, INTU, KIAA0556, KIZ, NEK2, NME7, OCRL1, OFD1, PIBF1, PLK4, POC1B, POC1A, RAB2B, RP2, TALPID3, TAPT1, TOPORS, TTL5, TUB, WDPCP*

### Cilia assembly:

*ARMC2, C9orf24, CCDC151, CFAP126, CFAP300, DAW1, DNAAF1, DNAAF3, LRRC6, MAK, MARCH10, PIH1D2, PIHD3, SAXO2, UBXN10, ZYMND10*

### Transition zone

*AHI1, B9D1, B9D2, CC2D2A, CEP900, C5orf42, IQCB1, LCA5, MKS1, NPHP1, NPHP4, RP1, RP1L1, RPGRIP, RPGRIP1, RPGRIP1L, SDCCAG8, SPATA7, TCTN1, TTN1, TCTN3, TMEM17, TMEM67, TMEM107, TMEM138, TMEM216, TMEM231, TMEM237, TMEM67, MKS1, CCT2*

### Centriolar satellites

*BBS4, CCDC28B, CFAP53, CEP290, KIAA0753, OFD1*

### Cilia base:

*ARMC3, C5orf49, CCDC170, TSGA10*

### Basal body:

*AGBL2, BBOF1, C11orf97, CABCO1, CCDC13, CFAF157, ENKUR, MAPK15, MORN1, PPP1R42, ARMC9*

### Tubulin modifying enzyme:

*TUB1A, TTLL6*

**Distal appendage:**  
*CEP83, CEP164, SCLT1, TTBK2*

**Unclear or various localization:**  
*ATXN10, CFAP52, NEK9, TULP1*

**Subdistal appendage:**  
*CC2D2A*

### Cilia trafficking:

**IFT dynein subunits:**  
*DYNC2H1, DYNC2LI1, TCTEX1D2, WDR34, WDR35, WDR60*

**IFT subcomplex A:**  
*IFT43, IFT140, WDR19, IFT122, TTC21B, IFT121, IFT139, IFT14*

**Cytoplasm related:**  
*IQCG, LRRRC23, MORN3, STK33*  
**Nuclear related:**  
*CCNA1, CFAP45, FOXJ1, MAP3K19, NEK11, SPATA4, ZEB2*

**BBS proteins**  
**BBSome:**  
*ARL, BBS1, BBS2, BBS4, BBS5, BBS7, BBS8, BBS9, TTC8*  
**Bbsome regulatoris:**  
*BIBP1, BBS10, BBS12, CEP290, C8orf37, LZFTL1, MKKS, MKS, SDCCAG8, TRIM32,*

**IFT Cilia regulators:**  
*FAM58A, ICK, MAK*

**IFT subcomplex B:**  
*CLUAP1, ITF23, ITF57, IFT52, IFT80, IFT81, IFT172, TRAF3IP1, IFT20, IFT46, IFT52, IFT57, IFT80, IFT88, IFT172, DISC1, RABL5, TRAF3LP1, TTC26, TTC30B, KIF3A, KIF3B, KIFAP3*

**LIFT:**  
*ARL13B, ARL3, PDE6D, RP2, UNC119*

**Ciliary receptor :**  
*TRPV4*

### TGA previously related genes:

**Laterality:**  
*ZIC3, PITX2, LEFTY2, FOXH1, GDF1, ACVR2B, NODAL, CFC1, LEFTY1, CCT2, CEP57, SLC4A1, AK7, ARL13B, POC1B, DISC1, DNAI1, CLASP1, DNAAF2, MLF1, IFT43, PRKAR1A, GPR161, NME8, B9D1, TMEM260, PLB1, SLC4A1.*

**Heart development:**  
*CITED2, HIF1A, TBX1, HSPG2, MED13L, ISL1, MYH6, MYH10, MEF2C*

**Table S2: Complete abnormalities of ciliary genes in TGA. Missense anomalies of ciliary genes found in patients with transposition of great arteries.**

| Patient                 | Gene           | dbSNP           | NT change | AA change | SIFT     | PP2.<br>HumDiv | PP2.<br>HumVar | Mutation<br>Assesor | Allele Freq              | OMIM | Mend | ¿Del? | Entity<br>Associated |
|-------------------------|----------------|-----------------|-----------|-----------|----------|----------------|----------------|---------------------|--------------------------|------|------|-------|----------------------|
| <b>T1801<br/>Male</b>   | <i>DNAH6</i>   | rs77489911<br>3 | c.637A>G  | p.I213V   | T (1)    | B (0.01)       | B (0.008)      | L (1.71)            | 2.75E x 10 <sup>-4</sup> | NR   | HETO | No    | No                   |
|                         | <i>FOXH1</i>   | rs89918950<br>5 | c.187G>A  | p.V63I    | T (0.69) | B (0.251)      | B (0.083)      | N (-1.43)           | 5.81E x 10 <sup>-5</sup> | NR   | HETO | No    | No                   |
|                         | <i>DNAH10</i>  | rs75210353<br>2 | c.2489G>A | p.R830Q   | T (0.37) | B (0.135)      | B (0.011)      | M (2.11)            | 1.77 x 10 <sup>-5</sup>  | NR   | HETO | No    | No                   |
|                         | <i>SAXO2</i>   | rs11632427<br>9 | c.1111T>C | p.S371P   | T (0.04) | PD (0.879)     | PD (0.635)     | M (2.14)            | 5.65 x 10 <sup>-4</sup>  | ND   | HETO | Yes   | No                   |
|                         | <i>WDR93</i>   | rs28727970      | c.238G>A  | p.A80T    | T (0.37) | B (0.028)      | B (0.014)      | N (0.74)            | 3.17 x 10 <sup>-3</sup>  | ND   | HETO | No    | No                   |
|                         | <i>DRC7</i>    | rs19982808<br>7 | c.1819C>T | p.R607C   | D (0.04) | D (0.912)      | PD (0.992)     | L (1.81)            | 2.83 x 10 <sup>-5</sup>  | NR   | HETO | Yes   | No                   |
|                         | <i>TTC25</i>   | rs78233380<br>6 | c.218C>T  | p.S73L    | D (0)    | PD (1)         | PD (0.976)     | M (2.54)            | 5.94 x 10 <sup>-4</sup>  | AR   | HETO | Yes   | No                   |
|                         | <i>RSPH14</i>  | rs78097110<br>4 | c.488A>G  | p.E163G   | D (0)    | B (0.026)      | B (0.028)      | M (2.71)            | 4.63 x 10 <sup>-4</sup>  | NR   | HETO | Yes   | No                   |
|                         | <i>RIOK1</i>   | rs55698032      | c.341G>A  | p.R115Q   | T (0.22) | B (0.007)      | B (0.004)      | L (1.2)             | 5.85 x 10 <sup>-5</sup>  | NR   | HETO | No    | No                   |
|                         | <i>PIBF1</i>   | rs17089782      | c.1214G>A | p.R405Q   | D (0)    | PD (1)         | PD (0.996)     | M (2.56)            | 0.1021                   | AR   | HETO | Yes   | Joubert              |
|                         | <i>KATNB1</i>  | rs14182060<br>7 | c.1841A>G | p.H614R   | T (0.07) | B (0.42)       | B (0.018)      | L (0.9)             | 1.31 x 10 <sup>-4</sup>  | AR   | HETO | No    | No                   |
|                         | <i>KDM6A</i>   | rs78023827<br>0 | c.232C>T  | p.R78C    | T (0.15) | B (0.05)       | b (0.009)      | L (1.31)            | 3.95 x 10 <sup>-5*</sup> | XL   | HEMY | No    | No                   |
| <b>T180201<br/>Male</b> | <i>UBXN10</i>  | rs11556959      | c.794A>G  | p.H265R   | D (0.01) | PD (0.982)     | PD (0.824)     | M (2.32)            | 2.60 x 10 <sup>-4</sup>  | NR   | HETO | Yes   | No                   |
|                         | <i>PLB1</i>    | rs62131028      | c.2710A>T | p.N904Y   | T (0.13) | PD (0.966)     | PD (0.942)     | M (2.05)            | 5.96 x 10 <sup>-3</sup>  | NR   | HETO | Yes   | No                   |
|                         | <i>NEK5</i>    | rs35465612      | c.1420C>T | p.R474C   | D (0)    | PD (1)         | PD (0.959)     | M (2.44)            | 9.27 x 10 <sup>-3</sup>  | NR   | HETO | Yes   | No                   |
|                         | <i>ALDH6A1</i> | rs18306644<br>2 | c.1604G>A | p.R535H   | D LC (0) | B (0)          | B (0.001)      | L (1.04)            | 7.9 x 10 <sup>-6 *</sup> | AR   | HETO | No    | No                   |
|                         | <i>IQCE</i>    | rs20064808<br>6 | c.1688T>C | p.L563S   | D (0)    | B (0.193)      | B (0.207)      | M (2.31)            | 5.23 x 10 <sup>-4</sup>  | AR   | HETO | Yes   | No                   |
|                         | <i>KMT2D</i>   | New             | c.547C>T  | p.P183S   | T (0.62) | PD (0.959)     | PD (0.6)       | N (0.55)            | New                      | AD   | HETO | Yes   | No                   |
|                         | <i>MEGF8</i>   | rs76986297<br>5 | c.1315C>T | p.R439W   | D (0)    | PD (1)         | PD (0.948)     | M (2.27)            | 6.13 x 10 <sup>-4*</sup> | AR   | HETO | Yes   | No                   |

|                         |                 |                  |                |          |             |            |            |           |                           |       |      |     |    |
|-------------------------|-----------------|------------------|----------------|----------|-------------|------------|------------|-----------|---------------------------|-------|------|-----|----|
| <b>T180301<br/>Male</b> | <i>RSPH10B2</i> | rs2711191        | c.212G>C       | p.S71T   | T (1)       | B (0)      | B (0.0)    | N (-2.04) | 9.51 x 10 <sup>-4</sup>   | ND    | HOMO | No  | No |
|                         | <i>RSPH10B2</i> | rs20194368<br>7  | c.1835A>G      | p.Y612C  | T (0.13)    | PD (0.761) | B (0.24)   | L (1.59)  | 4.24 x 10 <sup>-3</sup>   | ND    | HETO | No  | No |
|                         | <i>LRGUK</i>    | rs14017512<br>9  | c.2044C>T      | p.R682C  | D (0)       | PD (0.965) | B (0.270)  | N (0)     | 3.44 x 10 <sup>-2</sup>   | NR    | HETO | Yes | No |
|                         | <i>CFAP43</i>   | rs15037811<br>0  | c.3935G>A      | p.R1312H | T (0.12)    | PD (0.997) | PD (0.855) | M (2.59)  | 1.21 x 10 <sup>-3</sup>   | AD/AR | HETO | Yes | No |
|                         | <i>DNAH10</i>   | rs77989738<br>4  | c.1468C>A      | p.P490T  | D (0.01)    | PD (0.999) | PD (0.97)  | M (3.04)  | 1.98 x 10 <sup>-3</sup>   | NR    | HETO | Yes | No |
|                         | <i>DNAH3</i>    | rs76611408<br>9  | c.6556G>A      | p.V2186M | T (0.7)     | PD (0.924) | PD (0.967) | L (1.55)  | 4.35 x 10 <sup>-3</sup>   | NR    | HETO | No  | No |
|                         | <i>DNAH3</i>    | rs18246251<br>4  | c.608T>C       | p.M203T  | T (0.1)     | PD (0.454) | B (0.073)  | M (2.17)  | 3.95 x 10 <sup>-3</sup>   | NR    | HETO | Yes | No |
|                         | <i>TTLL6</i>    | rs18436295<br>5  | c.517C>T       | p.R173W  | D (0)       | PD (1)     | PD (1.0)   | H (4.64)  | 8.89X 10 <sup>-3</sup>    | NR    | HETO | Yes | No |
|                         | <i>DZANK1</i>   | rs13970057<br>5  | c.1142G>A      | p.R381Q  | T (0.1)     | B (0.106)  | B (0.018)  | L (1.06)  | 3.59 x 10 <sup>-2</sup>   | ND    | HETO | No  | No |
|                         | <i>DZANK1</i>   | rs11774037<br>7  | c.1019A>C      | p.Y340S  | T (0.13)    | B (0.001)  | B (0.0)    | N-(2.82)  | 3.50 x 10 <sup>-2</sup>   | ND    | HETO | No  | No |
|                         | <i>STX19</i>    | rs14512441<br>8  | c.70T>G        | p.S24A   | T (0.81)    | B (0)      | B (0.0)    | N (0)     | 1.03 x 10 <sup>-3</sup>   | ND    | HETO | No  | No |
|                         | <i>IQCE</i>     | rs18096184<br>1  | c.1148G>T      | p.R383L  | T (0.63)    | PD (0.924) | B (0.366)  | L (1.445) | 1.074 x 10 <sup>-3</sup>  | AR    | HETO | No  | No |
|                         | <i>CEP76</i>    | rs14680859<br>6  | c.985G>A       | p.A329T  | T (0.08)    | B (0.222)  | B (0.117)  | L (1.54)  | 2.68 x 10 <sup>-4*</sup>  | ND    | HETO | No  | No |
|                         | <i>KMT2D</i>    | rs20162835<br>7  | c.15686G><br>A | p.R5229H | D(0.04)     | PD (1)     | PD (0.98)  | N (0.255) | 2.49 x 10 <sup>-5**</sup> | AD    | HETO | Yes | No |
| <b>T180401<br/>Male</b> | <i>WDR35</i>    | rs13014514<br>24 | c.721C>G       | p.H241N  | T (0.6)     | B (0)      | B (0)      | L (1.08)  | 5.84 x 10 <sup>-5</sup>   | AR    | HETO | No  | No |
|                         | <i>CFAP100</i>  | rs14951102<br>3  | c.589G>A       | p.A197T  | T (0.04)    | PD (0.998) | PD (0.850) | M (2.715) | 6.85 x 10 <sup>-3</sup>   | ND    | HETO | Yes | No |
|                         | <i>CFAP77</i>   | rs11243798       | c.551G>A       | p.R184H  | D (0.04)    | PD (1)     | PD (0.994) | M (2.65)  | 5.03 x 10 <sup>-3</sup>   | ND    | HETO | Yes | No |
|                         | <i>TTC8</i>     | rs92816564<br>0  | c.595A>G       | p. I199V | T LC (0.26) | B (0.146)  | B (0.116)  | N (0.6)   | 4.76 x 10 <sup>-5</sup>   | AR    | HETO | No  | No |
|                         | <i>DNAH3</i>    | rs14471790<br>0  | c.4878T>G      | p.S1626R | D (0.01)    | B (0.187)  | B (0.103)  | L (1.64)  | 6.18 x 10 <sup>-2</sup>   | NR    | HETO | No  | No |
|                         | <i>HYDIN</i>    | New              | c.3332C>T      | p.P1111L | D (0)       | PD (0.999) | PD (0.988) | M (2.76)  | New                       | AR    | HOMO | Yes | No |

|                   |          |              |           |          |          |            |            |           |                           |       |      |     |                     |
|-------------------|----------|--------------|-----------|----------|----------|------------|------------|-----------|---------------------------|-------|------|-----|---------------------|
| T180701<br>Female | DNAH9    | rs139596704  | c.3050A>G | p.Y1017C | D (0)    | PD (0.981) | PD (0.827) | M (2.93)  | 5.30 x 10 <sup>-2</sup>   | AR    | HETO | Yes | No                  |
|                   | MYCBPAP  | rs73334009   | c.886C>T  | p.R296C  | T (0.17) | B (0)      | PD (0.556) | N (0.69)  | 9.96 x 10 <sup>-4</sup>   | NR    | HETO | No  | No                  |
|                   | PRSS54   | rs143446844  | c.626C>T  | p. T209M | T (0.27) | B (0.017)  | B (0.010)  | N (0.755) | 5.8 x 10 <sup>-3</sup>    | NR    | HETO | No  | No                  |
|                   | TRPV4    | rs187864727  | c.649G>T  | p.A217S  | T (0.13) | PD (1)     | PD (0.99)  | M (2.00)  | 6.85 x 10 <sup>-2</sup>   | AD    | HETO | Yes | Neuromus<br>c dyspl |
|                   | WDR63    | rs1056616254 | c.1742C>A | p.T581N  | D (0)    | PD (0.984) | PD (0.649) | M (2.58)  | 1.19 x 10 <sup>-5*</sup>  | NR    | HETO | Yes | No                  |
|                   | CFAP100  | rs754767651  | c.1292G>C | p.R430T  | D (0)    | PD (0.997) | PD (0.84)  | L (1.76)  | 3.76 x 10 <sup>-4</sup>   | ND    | HETO | Yes | No                  |
|                   | DNAH8    | rs752099198  | c.7906A>G | p.T2636A | T (0.31) | B (0.099)  | B (0.101)  | L (1.35)  | 3.73 x 10 <sup>-4</sup>   | AR    | HETO | No  | No                  |
|                   | CFAP43   | rs117768807  | c.589G>A  | p.V197M  | D (0)    | PD (0.999) | PD (0.973) | L (1.76)  | 3.05 x 10 <sup>-3</sup>   | AD/AR | HETO | Yes | No                  |
|                   | IFT46    | rs145438119  | c.454C>G  | p.P152A  | D (0.01) | PD (1)     | PD (1)     | M (3.25)  | 3.16 x 10 <sup>-3</sup>   | AR    | HETO | Yes | No                  |
|                   | MORN3    | rs782293129  | c.616G>C  | p.A206P  | D (0)    | PD (1)     | PD (1)     | M (2.87)  | 2.03 x 10 <sup>-4</sup>   | ND    | HETO | Yes | No                  |
|                   | TMEM260  | rs753356578  | c.469A>T  | p.M157L  | T (0.44) | B (0.002)  | B (0.002)  | L (1.01)  | 2.04 x 10 <sup>-4</sup>   | AR    | HETO | No  | No                  |
|                   | BBOF1    | rs190718961  | c.248G>A  | p.S83N   | T (0.2)  | B (0.001)  | B (0.003)  | N (0.74)  | 4.35 x 10 <sup>-3</sup>   | NR    | HETO | No  | No                  |
|                   | CCDC113  | rs144246110  | c.300A>T  | p.K100N  | D (0)    | PD (1)     | PD (0.997) | M (2.855) | 2.03 x 10 <sup>-3</sup>   | NR    | HETO | Yes | No                  |
|                   | DZANK1   | rs139700575  | c.1142G>A | p.R381Q  | T (0.1)  | B (0.106)  | B (0.018)  | L (1.06)  | 3.59 x 10 <sup>-2</sup>   | ND    | HETO | No  | No                  |
|                   | DZANK1   | rs117740377  | c.1019A>C | p.Y340S  | T (1)    | B (0.01)   | B (0.018)  | N (-2.82) | 3.50 x 10 <sup>-2</sup>   | ND    | HETO | No  | No                  |
|                   | TRAF3IP1 | rs761035757  | c.838C>T  | p.R280W  | D (0.01) | PD (0.999) | PD (0.913) | L (1.79)  | 2.56 x 10 <sup>-4</sup>   | AR    | HETO | Yes | No                  |
|                   | MIB1     | rs759658918  | c.1694C>G | p.T565S  | T (0.06) | PD (0.843) | PD (0.893) | L (0.9)   | 9.14 x 10 <sup>-5</sup>   | AD    | HETO | No  | No                  |
| T180801<br>Male   | TRPV4    | rs187864727  | c.649G>T  | p.A217S  | T (0.13) | PD (1)     | PD (0.99)  | M (2.00)  | 6.85 x 10 <sup>-2</sup>   | AD    | HETO | Yes | Neuromus<br>c dyspl |
|                   | RSPH10B2 | rs2711191    | c.212G>C  | p.S71T   | T (1)    | B (0)      | B (0)      | N (-2.04) | 9.51 x 10 <sup>-4</sup>   | ND    | HOMO | No  | No                  |
|                   | RSPH10B2 | rs759234050  | c.2510C>T | p.P837L  | T (0.06) | PD (0.998) | PD (0.871) | L (1.79)  | 5.32 x 10 <sup>-5**</sup> | ND    | HOMO | No  | No                  |

|                           |                |             |            |          |          |            |            |           |                          |     |      |     |         |
|---------------------------|----------------|-------------|------------|----------|----------|------------|------------|-----------|--------------------------|-----|------|-----|---------|
|                           | <i>DNAH10</i>  | rs755673190 | c.8228C>T  | p.P2743L | D (0.05) | B (0.005)  | B (0.005)  | M (2.53)  | 2.83 × 10 <sup>-5</sup>  | NR  | HETO | Yes | No      |
|                           | <i>DNAH10</i>  | rs199619464 | c.10258G>A | p.V3420I | T (0.51) | B (0.132)  | B (0.078)  | N (0.11)  | 9.08 × 10 <sup>-4</sup>  | NR  | HETO | No  | No      |
|                           | <i>PIBF1</i>   | rs17089782  | c.1214G>A  | p.R405Q  | D (0)    | PD (1)     | PD (0.966) | M (2.56)  | 0.1021                   | AR  | HOMO | Yes | Joubert |
|                           | <i>IQCE</i>    | rs375144768 | c.784C>T   | p.L262F  | D (0)    | PD (1)     | PD (0.998) | M (2.595) | 2.60 × 10 <sup>-4</sup>  | AR  | HETO | Yes | No      |
|                           | <i>INPP5E</i>  | rs138150684 | c.1360G>A  | p.D454N  | T (0.06) | PD (1)     | PD (0.885) | M (1.995) | 1.96 × 10 <sup>-4*</sup> | AR  | HETO | Yes | No      |
|                           | <i>OFD1</i>    | rs779051357 | c.2482T>G  | p.F828V  | T (0.07) | PD (0.903) | PD (0.591) | M (2.43)  | 5.17 × 10 <sup>-5</sup>  | XLD | HEMY | Yes | No      |
| <b>T180901<br/>Male</b>   | <i>MORN1</i>   | rs34587196  | c.757C>T   | p.R253W  | D (0)    | PD (1)     | PD (0.999) | M (2.25)  | 6.57 × 10 <sup>-3</sup>  | NR  | HETO | Yes | No      |
|                           | <i>WDR63</i>   | rs138379333 | c.922G>A   | p.A308T  | D (0.04) | PD (0.792) | B (0.14)   | M (2.49)  | 5.39 × 10 <sup>-2</sup>  | NR  | HETO | Yes | No      |
|                           | <i>CFAP65</i>  | rs144604393 | c.3079C>T  | p.R1027C | T (0.14) | B (0.481)  | B (0.032)  | M (2.04)  | 5.65 × 10 <sup>-5</sup>  | AR  | HETO | No  | No      |
|                           | <i>CFAP100</i> | rs199685364 | c.209G>A   | p.R70Q   | D (0.04) | B (0.105)  | B (0.027)  | L (1.53)  | 2.82 × 10 <sup>-4</sup>  | ND  | HETO | No  | No      |
|                           | <i>NEK11</i>   | rs141777290 | c.1915C>A  | p.Q639K  | T (0.14) | B (0.068)  | B (0.014)  | M (1.995) | 1.98 × 10 <sup>-4</sup>  | NR  | HETO | No  | No      |
|                           | <i>CCDC96</i>  | rs181515863 | c.721C>A   | p.R241S  | D (0.04) | B (0.322)  | B (0.034)  | L (0.805) | 2.18 × 10 <sup>-2</sup>  | ND  | HETO | No  | No      |
|                           | <i>CFAP70</i>  | rs575812060 | c.3079T>A  | p.C1027S | D (0.02) | PD (0.986) | PD (0.906) | M (2.43)  | 2.60 × 10 <sup>-3</sup>  | AR  | HETO | Yes | No      |
|                           | <i>ALDH6A1</i> | rs183066442 | c.1604G>A  | p.R535H  | D LC (0) | B (0)      | B (0.001)  | L (1.04)  | 1.75 × 10 <sup>-2</sup>  | AR  | HETO | No  | No      |
|                           | <i>DNAH3</i>   | rs144845767 | c.9329A>G  | p.N3110S | T (0.07) | B (0.004)  | B (0.024)  | L (1.89)  | 1.86 × 10 <sup>-3</sup>  | NR  | HETO | No  | No      |
|                           | <i>DNAH3</i>   | rs141197402 | c.8597A>G  | p.H2866R | D (0)    | PD (0.833) | PD (0.499) | L (1.29)  | 1.87 × 10 <sup>-3</sup>  | NR  | HETO | Yes | No      |
|                           | <i>PRSS54</i>  | rs143678998 | c.1121G>A  | p.R374K  | T (0.15) | PD (0.919) | B (0.214)  | M (2.00)  | 5.08 × 10 <sup>-4</sup>  | ND  | HETO | Yes | No      |
|                           | <i>DNAH9</i>   | rs267604735 | c.7150G>A  | p.G2384R | D (0.04) | PD (0.999) | D (0.918)  | H (3.71)  | 5.79 × 10 <sup>-5</sup>  | AR  | HETO | Yes | No      |
|                           | <i>MARCH10</i> | rs141504034 | c.1961G>C  | p.G654A  | T (0.47) | PD (0.887) | B (0.251)  | L (1.84)  | 7.90 × 10 <sup>-4</sup>  | NR  | HETO | No  | No      |
| <b>T181001<br/>Female</b> | <i>NPHP4</i>   | rs202179978 | c.1331G>A  | p.R444Q  | T (1)    | B (0.008)  | B (0.001)  | N (-0.34) | 6.79 × 10 <sup>-4</sup>  | AR  | HETO | No  | No      |

|                     |                |              |            |          |           |            |            |            |                         |       |      |     |    |
|---------------------|----------------|--------------|------------|----------|-----------|------------|------------|------------|-------------------------|-------|------|-----|----|
|                     | <i>ARMC9</i>   | rs386656198  | c.878C>T   | p.T293M  | T (1)     | PD (1)     | D (0.984)  | M (2.33)   | 5.24 × 10 <sup>-4</sup> | AR    | HETO | Yes | No |
|                     | <i>NEK11</i>   | rs140058289  | c.127G>C   | p.V43L   | D (0.01)  | PD (0.934) | PD (0.528) | M (3.41)   | 4.80 × 10 <sup>-2</sup> | NR    | HETO | Yes | No |
|                     | <i>DNAH11</i>  | rs199789835  | c.8521A>G  | p.S2841G | D (0.02)  | PD (0.957) | PD (0.796) | M (2.95)   | 2.23 × 10 <sup>-4</sup> | AR    | HETO | Yes | No |
|                     | <i>FBXL13</i>  | New          | c.253C>A   | p.H85N   | T (0.2)   | B (0.204)  | B (0.068)  | N (0.69)   | New                     | NR    | HETO | No  | No |
|                     | <i>ENKUR</i>   | rs144669094  | c.372T>G   | p.I124M  | B (0.06)  | B (0.204)  | B (0.055)  | M (2.32)   | 7.96E-6*                | NR    | HETO | No  | No |
|                     | <i>DNAH3</i>   | rs766114089  | c.6556G>A  | p.V2186M | T (0.7)   | PD (0.924) | B (0.342)  | L (1.55)   | 4.35 × 10 <sup>-3</sup> | NR    | HETO | No  | No |
|                     | <i>DRC3</i>    | rs761307066  | c.652C>G   | p.L218V  | T (0.57)  | B (0.001)  | B (0.003)  | N (0.67)   | 1.40 × 10 <sup>-3</sup> | NR    | HETO | No  | No |
|                     | <i>NRK</i>     | rs192589373  | c.2365C>T  | p.P789S  | T (0.25)  | B (0)      | B (0)      | N (0)      | 4.39 × 10 <sup>-2</sup> | NR    | HETO | No  | No |
|                     | <i>TTLL6</i>   | rs149873082  | c.893G>A   | p.R298H  | T (0.93)  | B (0)      | B (0)      | N (0.205)  | 2.23 × 10 <sup>-3</sup> | NR    | HETO | No  | No |
|                     | <i>OFD1</i>    | New          | c.2610G>C  | p.Q870H  | D (0.04)  | PD (0.899) | PD (0.639) | M (2.125)  | New                     | XL    | HEMY | Yes | No |
|                     | <i>KIF3B</i>   | rs1166002310 | c.1666C>T  | p.H556Y  | D (0.03)  | B (0.331)  | B (0.112)  | L (0.895)  | 1.40 × 10 <sup>-4</sup> | AD    | HETO | No  | No |
|                     | <i>CEP295</i>  | rs763108226  | c.512C>T   | p.P171L  | D (0.04)  | PD (0.728) | B (0.25)   | NF         | 5.37 × 10 <sup>-3</sup> | ND    | HETO | Yes | No |
|                     | <i>MEGF8</i>   | rs1281253733 | c.2344C>T  | p.R782W  | D (0.085) | PD (0.962) | D (0.898)  | N (0.345)  | 8.11 × 10 <sup>-6</sup> | AR    | HETO | Yes | No |
| <b>T181101 Male</b> | <i>SPAG17</i>  | rs140959339  | c.430C>T   | p.R144W  | D (0)     | PD (1)     | PD (0.99)  | M (2.70)   | 2.37 × 10 <sup>-2</sup> | NR    | HETO | Yes | No |
|                     | <i>RIOK1</i>   | rs1228728066 | c.333G>C   | p.K111N  | T (0.12)  | B (0.129)  | B (0.067)  | M (1.985)  | 5.78 × 10 <sup>-5</sup> | NR    | HETO | No  | No |
|                     | <i>DNAI1</i>   | rs771320807  | c.203G>A   | p.R68Q   | D (0)     | PD (0.998) | PD (0.917) | M (2.45)   | 2.89 × 10 <sup>-5</sup> | AR    | HETO | Yes | No |
|                     | <i>DYNC2H1</i> | rs200264343  | c.12937A>G | p.N4313D | D (0.09)  | B (0.064)  | B (0.015)  | N (0.34)   | 1.19 × 10 <sup>-3</sup> | AR/DR | HETO | No  | No |
|                     | <i>CCDC33</i>  | rs189088694  | c.52G>A    | p.A18T   | T (1)     | B (0.01)   | B (0.01)   | N (-1.245) | 2.21 × 10 <sup>-3</sup> | NR    | HETO | No  | No |
|                     | <i>C2CD3</i>   | rs150676400  | c.6343C>T  | p.P2115S | T (0.51)  | B (0.01)   | B (0.01)   | N (0.77)   | 5.00 × 10 <sup>-3</sup> | AR    | HETO | No  | No |
| <b>T181201 Male</b> | <i>SPAG17</i>  | rs102826158  | c.1700C>A  | p.P567Q  | D (0.01)  | PD (0.979) | PD (0.848) | M (2.62)   | 1.74 × 10 <sup>-4</sup> | NR    | HETO | Yes | No |



|                 |                 |                  |           |          |           |            |            |           |                         |       |      |     |         |
|-----------------|-----------------|------------------|-----------|----------|-----------|------------|------------|-----------|-------------------------|-------|------|-----|---------|
| T181401<br>Male | <i>PLB1</i>     | rs62131028       | c.2710A>T | p.N904Y  | T (0.13)  | PD (0.996) | PD (0.942) | M (2.05)  | 5.96 x 10 <sup>-3</sup> | NR    | HOMO | Yes | No      |
|                 | <i>RSPH10B2</i> | rs27111191       | c.212G>C  | p.S71T   | T (1)     | B (0)      | B (0.0)    | N (-2.04) | 9.51 x 10 <sup>-4</sup> | ND    | HOMO | No  | No      |
|                 | <i>AGBL2</i>    | rs7941404        | c.956G>A  | p.R319H  | T (0.09)  | PD (0.999) | PD (0.917) | M (2.49)  | 9.9E-5*                 | NR    | HETO | Yes | No      |
|                 | <i>CFAP54</i>   | rs14235805<br>55 | c.1964A>G | p.H655R  | T (0.07)  | B (0.124)  | B (0.124)  | NF        | 9.37E-6*                | ND    | HETO | No  | No      |
|                 | <i>DNAH9</i>    | rs13959670<br>4  | c.3050A>G | p.Y1017C | D (0)     | PD (0.981) | PD (0.827) | M (2.93)  | 5.30 x 10 <sup>-2</sup> | AR    | HETO | Yes | No      |
|                 | <i>PIBF1</i>    | rs17089782       | c.1214G>A | p.R405Q  | D (0)     | PD (1)     | PD (0.996) | M (2.56)  | 0.1021                  | AR    | HOMO | Yes | Joubert |
|                 | <i>LZTFL1</i>   | rs75196880<br>7  | c.724A>G  | p.T242A  | T (0.47)  | B (0.01)   | B (0.02)   | N (0.4)   | 0.001721                | AR    | HETO | No  | No      |
|                 | <i>RPGRIP1L</i> | New              | c.2957A>G | p.D986G  | T (0.035) | B (0)      | B (0.0)    | N (0)     | New                     | AR    | HETO | No  | No      |
|                 | <i>CEP192</i>   | rs11790167<br>7  | c.6737T>C | p.F2246S | T (0.24)  | B (0.036)  | B (0.030)  | NF        | 5.56 x 10 <sup>-3</sup> | NR    | HETO | No  | No      |
|                 | <i>TEKT2</i>    | rs14449798<br>4  | c.1114C>T | p.R372W  | D (0.01)  | PD (1)     | PD (0.99)  | M (2.86)  | 2.21 x 10 <sup>-2</sup> | NR    | HETO | Yes | No      |
|                 | <i>CCDC13</i>   | rs34234072       | c.164A>G  | p.D55G   | D (0.05)  | B (0.001)  | B (0.003)  | L (1.64)  | 4.74 x 10 <sup>-3</sup> | ND    | HETO | No  | No      |
|                 | <i>BBS7</i>     | rs19989133<br>0  | c.508A>G  | p.R170G  | D (0.02)  | PD (1)     | PD (0.994) | M (2.66)  | 9.84 x 10 <sup>-4</sup> | AR    | HETO | Yes | No      |
|                 | <i>SPATA4</i>   | rs76503401<br>7  | c.599A>C  | p.N200T  | D (0.02)  | PD (0.984) | PD (0.884) | M (2.17)  | 8.67 x 10 <sup>-5</sup> | ND    | HETO | Yes | No      |
|                 | <i>IFT140</i>   | New              | c.60T>G   | p.F20L   | T (0.52)  | B (0)      | B (0.0)    | N (-0.97) | New                     | AR    | HETO | No  | No      |
|                 | <i>DZANK1</i>   | rs79400176       | c.848G>A  | p.S283N  | T (0.47)  | B (0.077)  | B (0.026)  | L (1.76)  | 3.76 x 10 <sup>-3</sup> | ND    | HETO | No  | No      |
|                 | <i>TTBK2</i>    | rs20077324<br>8  | c.1936C>G | p.Q646E  | T (0.05)  | B (0.304)  | B (0.072)  | M (2.38)  | 3.92 x 10 <sup>-4</sup> | AD    | HETO | No  | No      |
|                 | <i>CEP44</i>    | rs13933169<br>6  | c.556A>G  | p.I186V  | T (0.61)  | B (0.017)  | B (0.11)   | L (1.245) | 6.75 x 10 <sup>-4</sup> | ND    | HETO | No  | No      |
|                 | <i>EVC2</i>     | rs75438004<br>1  | c.209G>T  | p.G70V   | T (0.19)  | B (0.082)  | B (0.276)  | N (0)     | 4.57 x 10 <sup>-4</sup> | AR/AD | HETO | No  | No      |
|                 | <i>KIFAP3</i>   | rs12030924<br>09 | c.646C>G  | p.H216D  | T (0.07)  | B (0.44)   | B (0.138)  | M (2.05)  | 3.25 x 10 <sup>-5</sup> | NR    | HETO | No  | No      |

The algorithms could display several differences for a single variant, and the deleteriousness should be interpreted in this context. *TRPV4* and *PIBF1* genetic variants had been previously reported to other genetic diseases. dbSNP: Single Nucleotide Polymorphism database ; AA: Amino acid; NT: Nucleotide; SIFT: PP2: Polyphen2; Freq: Frequency; Mend: Mendelian inheritance; OMIM: Online Mendelian Inheritance of Man; PD: Probably/Possibly damaging; B: Benign; L: Lo; M: Medium; H: High; N: Neutral; T: Tolerated; Del/D: Deleterious. AD: Autosomic dominant; AR:

Autosomal recessive; NF: Not found; HETO: Heterozygous; HOMO: Homozygous; HEMY: Hemizygous; Neuromusc dyspl: Neuromuscular dysplasia. Allele frequency in latin population or if data is not available an asterisk (\*) represent global frequency

**Table S3: Protein clusters of selected genes in TGA patients.** The analysis was performed in String using the Markov clustering algorithm.

| #Clustering method | Cluster number | Cluster color | Gene count | Protein name | protein identifier   |
|--------------------|----------------|---------------|------------|--------------|----------------------|
| MCL                | 1              | Red           | 8          | DNAH10       | 9606.ENSP00000386770 |
| MCL                | 1              | Red           | 8          | DNAH11       | 9606.ENSP00000475939 |
| MCL                | 1              | Red           | 8          | DNAH3        | 9606.ENSP00000261383 |
| MCL                | 1              | Red           | 8          | DNAH9        | 9606.ENSP00000262442 |
| MCL                | 1              | Red           | 8          | DNAI1        | 9606.ENSP00000480538 |
| MCL                | 1              | Red           | 8          | TTC18        | 9606.ENSP00000310829 |
| MCL                | 1              | Red           | 8          | TTC25        | 9606.ENSP00000478589 |
| MCL                | 1              | Red           | 8          | WDR63        | 9606.ENSP00000294664 |
| MCL                | 2              | Brown         | 7          | CCDC135      | 9606.ENSP00000353942 |
| MCL                | 2              | Brown         | 7          | CCDC65       | 9606.ENSP00000312706 |
| MCL                | 2              | Brown         | 7          | HYDIN        | 9606.ENSP00000377197 |
| MCL                | 2              | Brown         | 7          | MNS1         | 9606.ENSP00000260453 |
| MCL                | 2              | Brown         | 7          | NEK5         | 9606.ENSP00000347767 |
| MCL                | 2              | Brown         | 7          | TEKT2        | 9606.ENSP00000207457 |
| MCL                | 2              | Brown         | 7          | TTLL6        | 9606.ENSP00000377043 |
| MCL                | 3              | Olive         | 5          | BBS7         | 9606.ENSP00000264499 |

---

|     |   |                |   |          |                      |
|-----|---|----------------|---|----------|----------------------|
| MCL | 3 | Olive          | 5 | DISC1    | 9606.ENSPO0000355593 |
| MCL | 3 | Olive          | 5 | IFT46    | 9606.ENSPO0000264020 |
| MCL | 3 | Olive          | 5 | TRAF3IP1 | 9606.ENSPO0000362424 |
| MCL | 3 | Olive          | 5 | UBXN10   | 9606.ENSPO0000364240 |
| MCL | 4 | Green          | 3 | CCDC113  | 9606.ENSPO0000219299 |
| MCL | 4 | Green          | 3 | SPAG17   | 9606.ENSPO0000337804 |
| MCL | 4 | Green          | 3 | SPATA4   | 9606.ENSPO0000280191 |
| MCL | 5 | Blue           | 2 | OFD1     | 9606.ENSPO0000344314 |
| MCL | 5 | Blue           | 2 | PIBF1    | 9606.ENSPO0000317144 |
| MCL | 6 | Light Sky Blue | 2 | AK7      | 9606.ENSPO0000267584 |
| MCL | 6 | Light Sky Blue | 2 | CFAP43   | 9606.ENSPO0000349568 |
| MCL | 7 | Medium Blue    | 2 | CCDC37   | 9606.ENSPO0000344749 |
| MCL | 7 | Medium Blue    | 2 | MORN3    | 9606.ENSPO0000347486 |

---

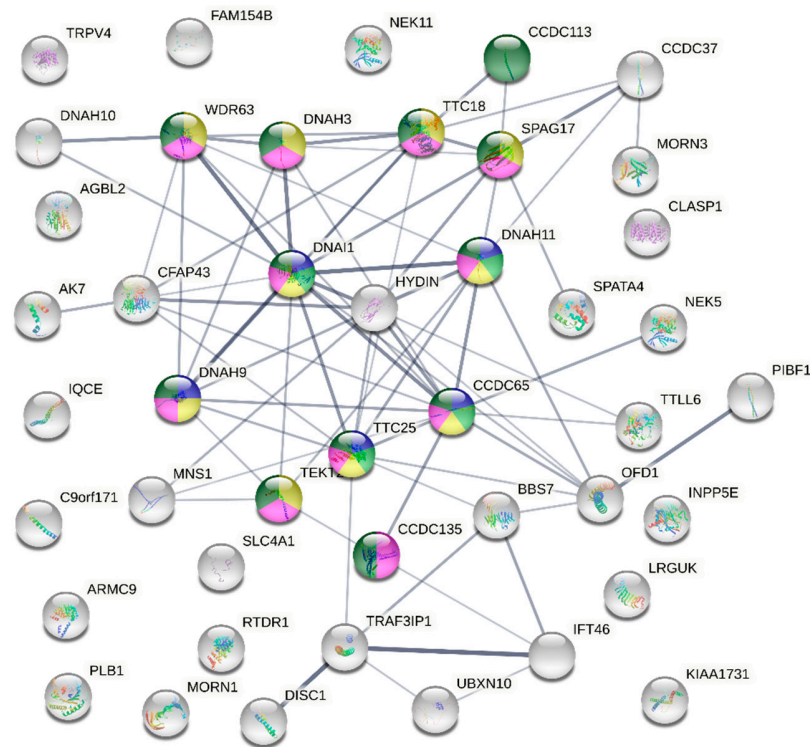

| Local network cluster (STRING) |                                                                  |                  |          |                      |
|--------------------------------|------------------------------------------------------------------|------------------|----------|----------------------|
| cluster                        | description                                                      | count in network | strength | false discovery rate |
| CL:10812                       | Axonemal dynein complex                                          | 3 of 15          | 1.95     | 0.0048               |
| CL:10696                       | Kartagener syndrome                                              | 3 of 16          | 1.92     | 0.0050               |
| CL:10690                       | Primary ciliary dyskinesia, and axonemal central apparatus       | 7 of 41          | 1.88     | 1.08e-08             |
| CL:10692                       | Primary ciliary dyskinesia                                       | 5 of 30          | 1.87     | 1.05e-05             |
| CL:10694                       | Primary ciliary dyskinesia                                       | 4 of 24          | 1.87     | 0.00028              |
| CL:10689                       | Primary ciliary dyskinesia, and COPI-independent Golgi-to-E...   | 10 of 78         | 1.76     | 6.49e-12             |
| CL:10687                       | Mixed, incl. primary ciliary dyskinesia, and copi-independent... | 11 of 107        | 1.66     | 3.43e-12             |
| CL:10686                       | Mixed, incl. primary ciliary dyskinesia, and copi-independent... | 12 of 130        | 1.61     | 1.02e-12             |

**Figure S1: Genetic anomalies aggregation of transposition of the great arteries by String.** Further Ciliary dyskinesia, genetic variants are accumulated in COPI independent Golgi to ER retrograde traffic.
